# Supplementary material for: Estimated Respiratory Syncytial Virus-Related Hospitalizations and Deaths Among Children and Adults in Spain, 2016–2019
Source: PubMed Central journal article supplement — Infect Dis Ther. 2024 Feb 6;13(3):463–80. doi: 10.1007/s40121-024-00920-7 (PMC10965866; doi:10.1007/s40121-024-00920-7), 2024-02-06

# SUPPLEMENTARY MATERIAL

Estimated Respiratory Syncytial Virus-related Hospitalizations and Deaths Among Children and Adults in Spain, 2016–2019

## **AUTHOR DETAILS:**

Mariana Haeberer<sup>1</sup>, Robin Bruyndonckx<sup>2</sup>, Aleksandra Polkowska-Kramek<sup>2</sup>, Antoni Torres<sup>3</sup>, Caihua Liang<sup>1</sup>, Charles Nuttens<sup>1</sup>, Maribel Casas<sup>2</sup>, Francesca Lemme<sup>2</sup>, Worku Biyadgie Ewnetu<sup>2</sup>, Thao Mai Phuong Tran<sup>2</sup>, Jessica E. Atwell<sup>1</sup>, Cristina Mendez Diez<sup>1</sup>, Bradford D. Gessner<sup>1</sup>, Elizabeth Begier<sup>1</sup>

## Affiliations:

<sup>1</sup> Pfizer SL, Spain; Pfizer Inc, France; Pfizer Inc, USA; Pfizer Inc, Ireland.

<sup>2</sup> Epidemiology & Pharmacovigilance, P95, Leuven, Belgium.

<sup>3</sup> Clínic Barcelona Hospital, Spain.

**Supplementary Table 1. ICD-10 CM codes included in outcome definitions**

| <b>Outcome category</b>                    | <b>ICD-10-CM</b>                                               |
|--------------------------------------------|----------------------------------------------------------------|
| <b>Cardiorespiratory</b>                   | <b>J00-J99, I42-I43, I50, I51.7, I20-I25, I44-I49, I60-I68</b> |
| <b>All respiratory</b>                     | <b>J00-J99</b>                                                 |
| <b>Influenza or pneumonia</b>              | <b>J09-J18</b>                                                 |
| <b>Bronchitis or bronchiolitis</b>         | <b>J20-J22</b>                                                 |
| <b>Chronic lower respiratory diseases</b>  | <b>J40-J47</b>                                                 |
| <b>Upper respiratory diseases</b>          | <b>J00-J06, J30-J39</b>                                        |
| <b>Chronic heart failure exacerbations</b> | <b>I42-I43, I50, I51.7</b>                                     |
| <b>Ischemic heart diseases</b>             | <b>I20-I25</b>                                                 |
| <b>Arrhythmias</b>                         | <b>I44-I49</b>                                                 |
| <b>Cerebrovascular diseases</b>            | <b>I60-I68</b>                                                 |
| <b>RSV-specific</b>                        | <b>B97.4, J21.0, J12.1, J20.5</b>                              |

**Supplementary Figure 1. Estimated (model-based) vs observed plots of primary outcomes in children and adults, Spain, 2016–2019**

**A. Estimated (model-based) vs observed respiratory hospitalizations in children aged 0–5 months (A), 6–11 months (B), 12–23 months (C), 2–5 years (D) and 6–17 years (E), Spain, 2016–2019**

**A**

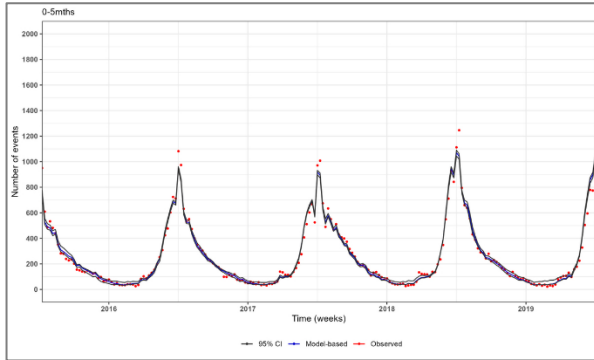

**B**

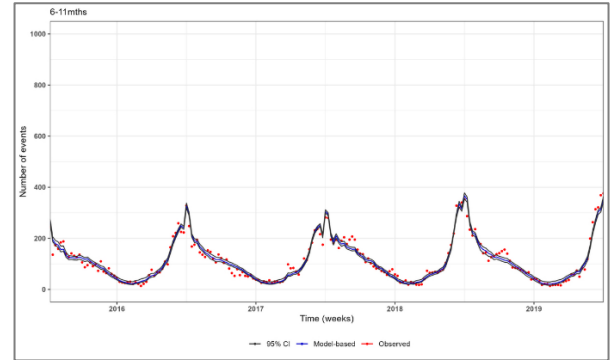

**C**

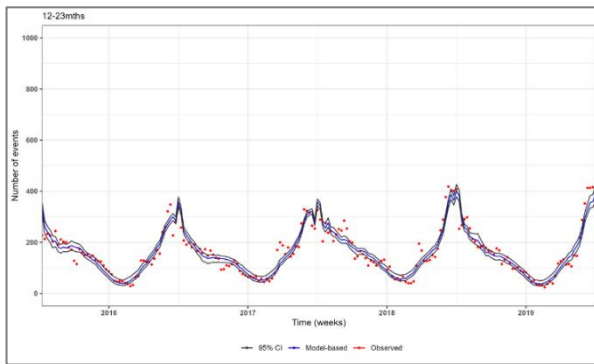

**D**

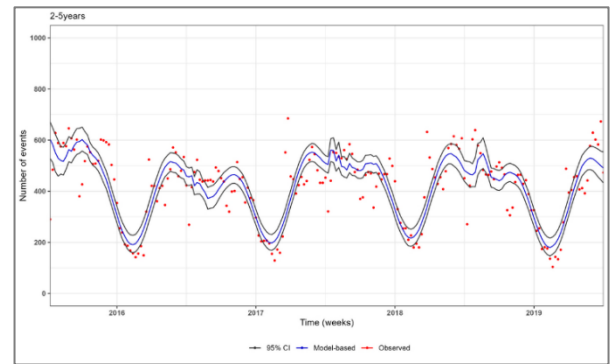

**E**

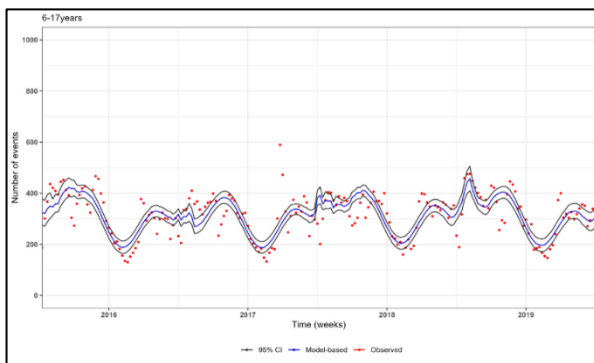

**B. Estimated (model-based) vs observed cardiorespiratory hospitalizations in adults aged 18–49 (A), 50–59 (B), 60–79 (C), and ≥80 years (D), Spain 2016–2019**

**A**

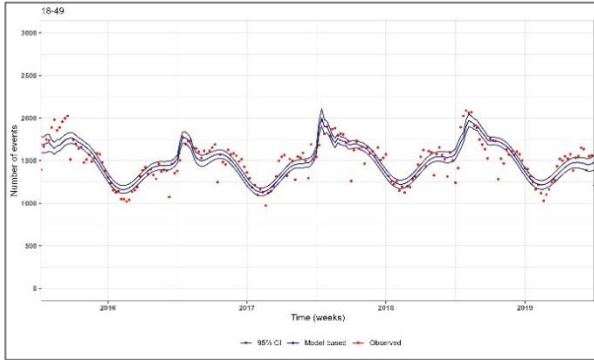

**B**

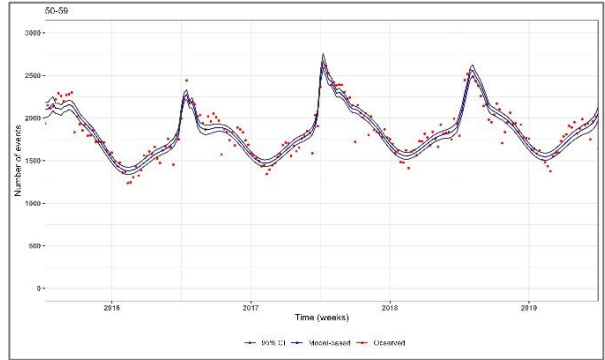

**C**

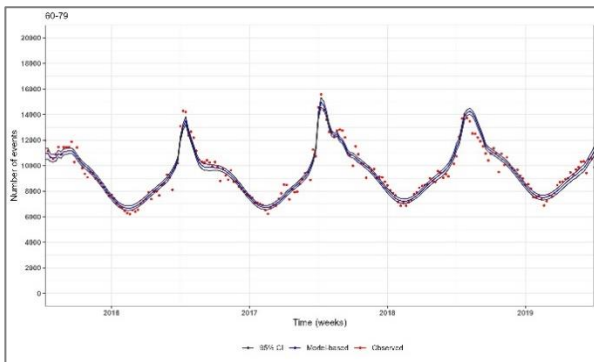

**D**

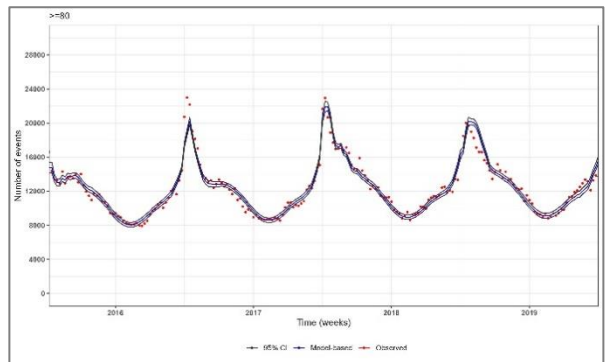

C. Estimated (model-based) vs observed respiratory hospitalizations in adults aged 18–49 (A), 50–59 (B), 60–79 (C), and ≥80 years (D), Spain, 2016–2019

A

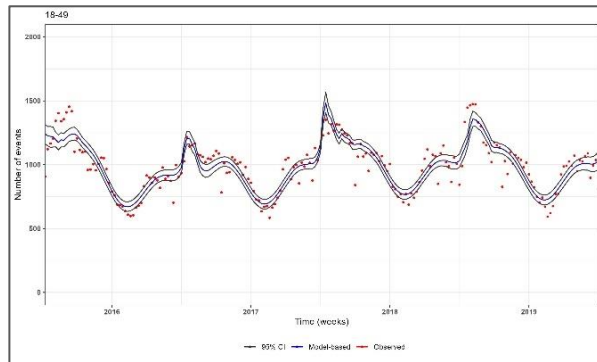

B

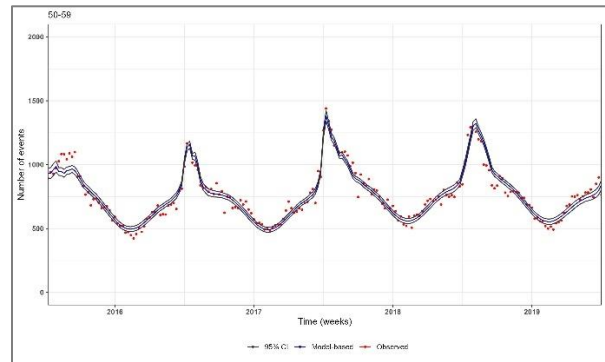

C

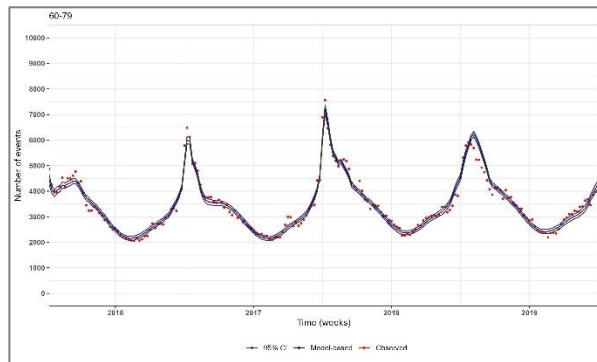

D

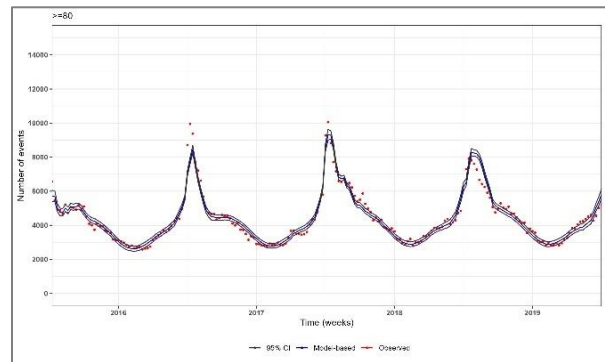

**D. Estimated (model-based) versus observed underlying cardiorespiratory deaths in adults aged 18–49 (A), 50–59 (B), 60–79 (C), and ≥80 years (D), Spain, 2016–2019**

**A**

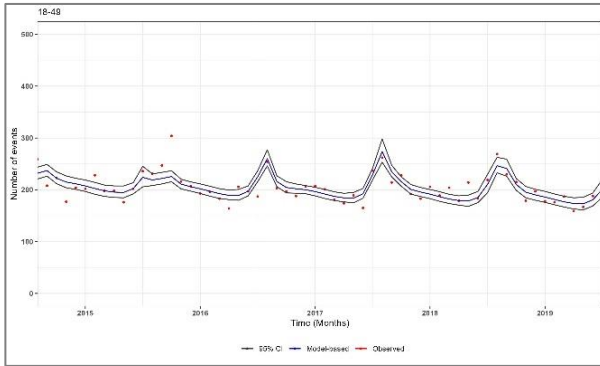

**B**

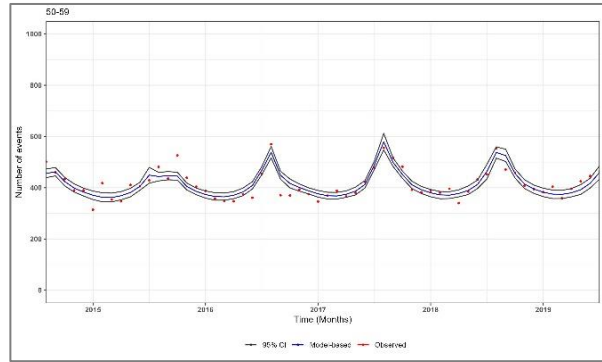

**C**

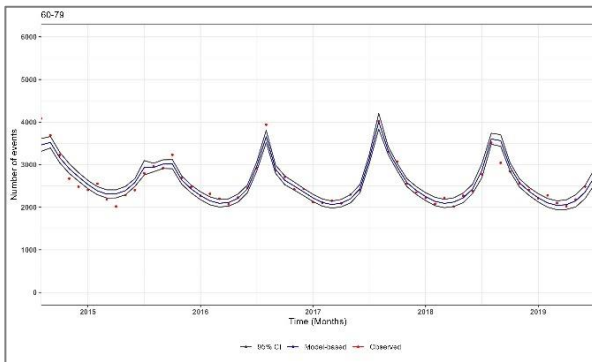

**D**

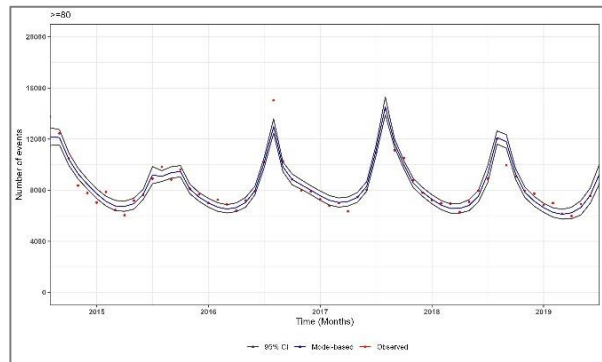

E. Estimated (model-based) versus observed underlying respiratory deaths in adults aged 18–49 (A), 50–59 (B), 60–79 (C), and ≥80 years (D), Spain, 2016–2019

A

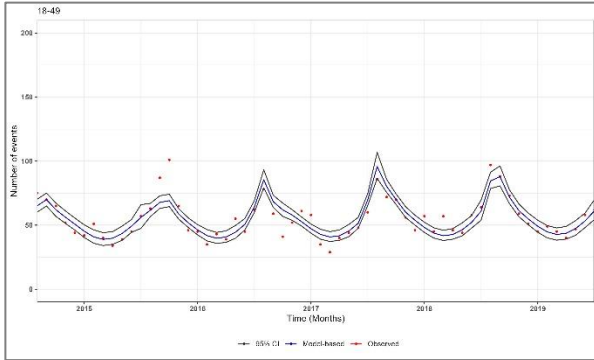

B

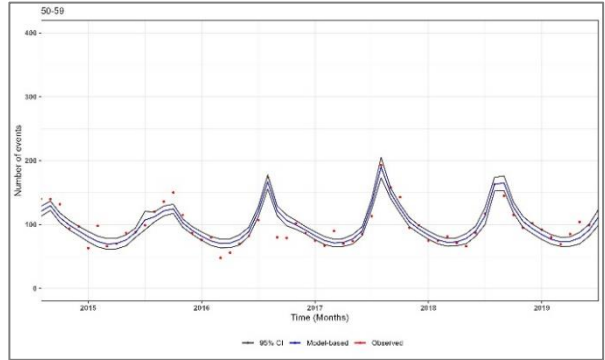

C

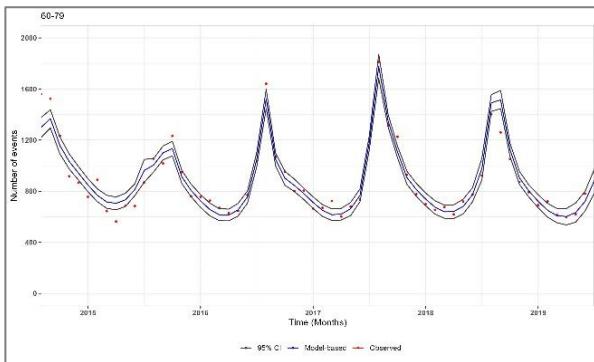

D

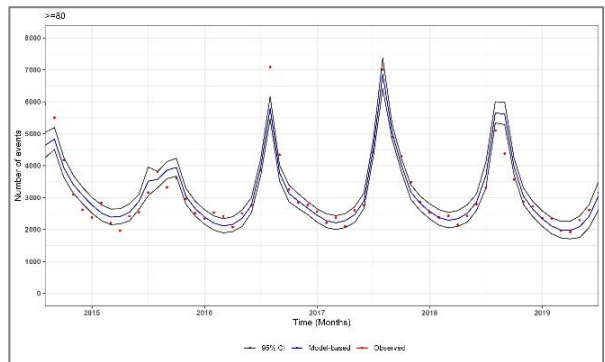

Supplement: 40121_2024_920_MOESM1_ESM.pdf [file 40121_2024_920_MOESM1_ESM.pdf]
